# Supplementary material for: Readability of web-based sources about induced abortion: a cross-sectional study
Source: PubMed Central journal article supplement (PMC7275615; doi:10.1186/s12911-020-01132-y), 2020-06-05
Supplement: 12911_2020_1132_MOESM1_ESM.pdf [file 12911_2020_1132_MOESM1_ESM.pdf]

STROBE Statement—Checklist of items that should be included in reports of *cross-sectional studies*

|                              | <b>Item No</b> | <b>Recommendation</b>                                                                                                                                                                | <b>Found in manuscript</b>                                                               |
|------------------------------|----------------|--------------------------------------------------------------------------------------------------------------------------------------------------------------------------------------|------------------------------------------------------------------------------------------|
| <b>Title and abstract</b>    | 1              | (a) Indicate the study's design with a commonly used term in the title or the abstract                                                                                               | Title                                                                                    |
|                              |                | (b) Provide in the abstract an informative and balanced summary of what was done and what was found                                                                                  | Abstract                                                                                 |
| <b>Introduction</b>          |                |                                                                                                                                                                                      |                                                                                          |
| Background/rationale         | 2              | Explain the scientific background and rationale for the investigation being reported                                                                                                 | Background paragraph 1 & 2                                                               |
| Objectives                   | 3              | State specific objectives, including any prespecified hypotheses                                                                                                                     | Methods, Aim Paragraph 1                                                                 |
| <b>Methods</b>               |                |                                                                                                                                                                                      |                                                                                          |
| Study design                 | 4              | Present key elements of study design early in the paper                                                                                                                              | Methods, Design Paragraph 1                                                              |
| Setting                      | 5              | Describe the setting, locations, and relevant dates, including periods of recruitment, exposure, follow-up, and data collection                                                      | Methods, Identification of websites Paragraph 1;<br>Methods, Data collection Paragraph 1 |
| Participants                 | 6              | (a) Give the eligibility criteria, and the sources and methods of selection of participants                                                                                          | Methods, Identification of websites Paragraph 1                                          |
| Variables                    | 7              | Clearly define all outcomes, exposures, predictors, potential confounders, and effect modifiers. Give diagnostic criteria, if applicable                                             | Methods, Data collection Paragraph 1                                                     |
| Data sources/<br>measurement | 8*             | For each variable of interest, give sources of data and details of methods of assessment (measurement). Describe comparability of assessment methods if there is more than one group | Methods, Data collection Paragraph 1                                                     |
| Bias                         | 9              | Describe any efforts to address potential sources of bias                                                                                                                            | N/A                                                                                      |
| Study size                   | 10             | Explain how the study size was arrived at                                                                                                                                            | Methods, Identification of websites Paragraph 1                                          |
| Quantitative variables       | 11             | Explain how quantitative variables were handled in the analyses. If applicable, describe which groupings were chosen and why                                                         | Methods, Data analysis Paragraph 1                                                       |
| Statistical methods          | 12             | (a) Describe all statistical methods, including those used to control for confounding                                                                                                | Methods, Data analysis Paragraph 1                                                       |
|                              |                | (b) Describe any methods used to examine subgroups and interactions                                                                                                                  | N/A                                                                                      |
|                              |                | (c) Explain how missing data were addressed                                                                                                                                          | N/A                                                                                      |
|                              |                | (d) If applicable, describe analytical methods taking account of sampling strategy                                                                                                   | N/A                                                                                      |
|                              |                | (e) Describe any sensitivity analyses                                                                                                                                                | N/A                                                                                      |
| <b>Results</b>               |                |                                                                                                                                                                                      |                                                                                          |
| Participants                 | 13*            | (a) Report numbers of individuals at each stage of study—eg numbers potentially eligible, examined for                                                                               | Methods, Identification of websites Paragraph 1                                          |

|                          |     |                                                                                                                                                                                                              |                                                           |
|--------------------------|-----|--------------------------------------------------------------------------------------------------------------------------------------------------------------------------------------------------------------|-----------------------------------------------------------|
|                          |     | eligibility, confirmed eligible, included in the study, completing follow-up, and analysed                                                                                                                   |                                                           |
|                          |     | (b) Give reasons for non-participation at each stage                                                                                                                                                         | Methods, Identification of websites Paragraph 1           |
|                          |     | (c) Consider use of a flow diagram                                                                                                                                                                           | N/A                                                       |
| Descriptive data         | 14* | (a) Give characteristics of study participants (eg demographic, clinical, social) and information on exposures and potential confounders                                                                     | Results Paragraph 1                                       |
|                          |     | (b) Indicate number of participants with missing data for each variable of interest                                                                                                                          | N/A                                                       |
| Outcome data             | 15* | Report numbers of outcome events or summary measures                                                                                                                                                         | Results Paragraph 2                                       |
| Main results             | 16  | (a) Give unadjusted estimates and, if applicable, confounder-adjusted estimates and their precision (eg, 95% confidence interval). Make clear which confounders were adjusted for and why they were included | Results Paragraph 2                                       |
|                          |     | (b) Report category boundaries when continuous variables were categorized                                                                                                                                    | Methods, Data collection Paragraph 1; Results Paragraph 1 |
|                          |     | (c) If relevant, consider translating estimates of relative risk into absolute risk for a meaningful time period                                                                                             | N/A                                                       |
| Other analyses           | 17  | Report other analyses done—eg analyses of subgroups and interactions, and sensitivity analyses                                                                                                               | N/A                                                       |
| <b>Discussion</b>        |     |                                                                                                                                                                                                              |                                                           |
| Key results              | 18  | Summarise key results with reference to study objectives                                                                                                                                                     | Discussion, Principal results Paragraph 1                 |
| Limitations              | 19  | Discuss limitations of the study, taking into account sources of potential bias or imprecision. Discuss both direction and magnitude of any potential bias                                                   | Discussion, Methodological limitations Paragraph 1        |
| Interpretation           | 20  | Give a cautious overall interpretation of results considering objectives, limitations, multiplicity of analyses, results from similar studies, and other relevant evidence                                   | Discussion, Principal results Paragraph 2 & 3             |
| Generalisability         | 21  | Discuss the generalisability (external validity) of the study results                                                                                                                                        | Discussion, Methodological limitations Paragraph 2        |
| <b>Other information</b> |     |                                                                                                                                                                                                              |                                                           |
| Funding                  | 22  | Give the source of funding and the role of the funders for the present study and, if applicable, for the original study on which the present article is based                                                | Declarations, Funding Paragraph 1                         |

\*Give information separately for exposed and unexposed groups.

**Note:** An Explanation and Elaboration article discusses each checklist item and gives methodological background and published examples of transparent reporting. The STROBE checklist is best used in conjunction with this article (freely available on the Web sites of PLoS Medicine at <http://www.plosmedicine.org/>, Annals of Internal Medicine at

<http://www.annals.org/>, and *Epidemiology* at <http://www.epidem.com/>). Information on the STROBE Initiative is available at [www.strobe-statement.org](http://www.strobe-statement.org).
